# Supplementary material for: Cyan-rich sunlight-like spectra from Mn2+-doped CsCd(Cl1−yBry)3perovskites with dual tunable emissions and high stability
Source: Royal Society of Chemistry journal article supplement (doi:10.1039/d2tc05455h), 2023-01-01
Supplement: d2tc05455h1.pdf [file d2tc05455h1.pdf]

## Cyan-rich Sunlight-like Spectra from $\text{Mn}^{2+}$ -doped $\text{CsCd}(\text{Cl}_{1-y}\text{Br}_y)_3$ Perovskites with Dual Tunable Emissions and High Stability

Tianzhuo Wen, Guoxian Gu,\* Bofei Wang, Wenjun Zhang,\* and Ruihu Wang

College of Chemical Engineering, Hebei University of Technology, Tianjin 300401, People's  
Republic of China

### Methods

**Materials:**  $\text{CsCl}$  (99.99% metals basis),  $\text{CdCl}_2$  (anhydrous, 99.99% metals basis),  $\text{MnCl}_2 \cdot 5\text{H}_2\text{O}$  (99.99% metals basis) and  $\text{CsBr}$  (99.99% metals basis) were all purchased from Aladdin. No further purifications were conducted to prepare the product.

**Preparation of precursors:** 1mmol (16.84 mg)  $\text{CdCl}_2$  was dissolved in 500uL ultrapure water as the precipitant, and 1mmol (18.83 mg)  $\text{CsCl}$  was dissolved in 500  $\mu\text{L}$  ultrapure water as  $\text{CsCl}$  precursor.

**Synthesis:** The  $\text{CdCl}_2$  precipitant was swiftly injected in  $\text{CsCl}$  precursor, and immediately the white precipitation of  $\text{CsCdCl}_3$  would form in water. To obtain composite samples, the amount of  $\text{Br}^-$  ought to hold in 0.06 mmol (2.13 mg) - 0.50 mmol (10.63 mg), and  $\text{Mn}^{2+}$  is 0.1 mmol (1.79 mg) - 1.0 mmol (17.97 mg), added to  $\text{CsCl}$  precursor. Then leaved the precipitant saturating in the water for 30 minutes to ensure a fully ion exchange. No washing was needed in the process, and all the precipitations were dried at  $50^\circ\text{C}$  for 6 hours.

**Characterization:** X-ray diffraction was performed on the German Bruker D8 Advance X-ray diffractometer with  $\text{Cu K}\alpha$  radiation. Scanning electron microscope was performed on Czechoslovakia Tescan MIRA LMS. The photoluminescence (PL) spectra collections were measured us a fluoresce spectrophotometer (F-4600 fluoresce spectrophotometer, Japan). The luminescence decay curves were obtained using Edinburgh FLS1000 fluoresce spectrophotometer. The luminous flux, luminous efficiencies, Ra of WLEDs were measured using a LED automatic temperature control photoelectric analysis and measurement system. (ATA-500, EVERFINE)

## Optical properties

Rich cyan light in white light spectra of  $\text{CsCd}_{1-x}(\text{Cl}_{1-y}\text{Br}_y)_3: x\text{Mn}^{2+}$  making it more close to sunlight in the range 380-500nm (Fig. S1) compared with the previous works <sup>1 2 3 4</sup>

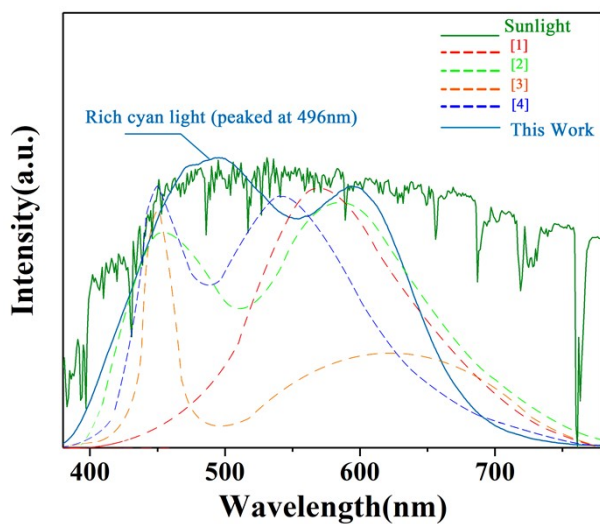

Fig S1 The emission spectrum of the sunlight, previous works and  $\text{CsCd}_{0.6}(\text{Cl}_{0.9}\text{Br}_{0.1})_3: 0.4\text{Mn}^{2+}$

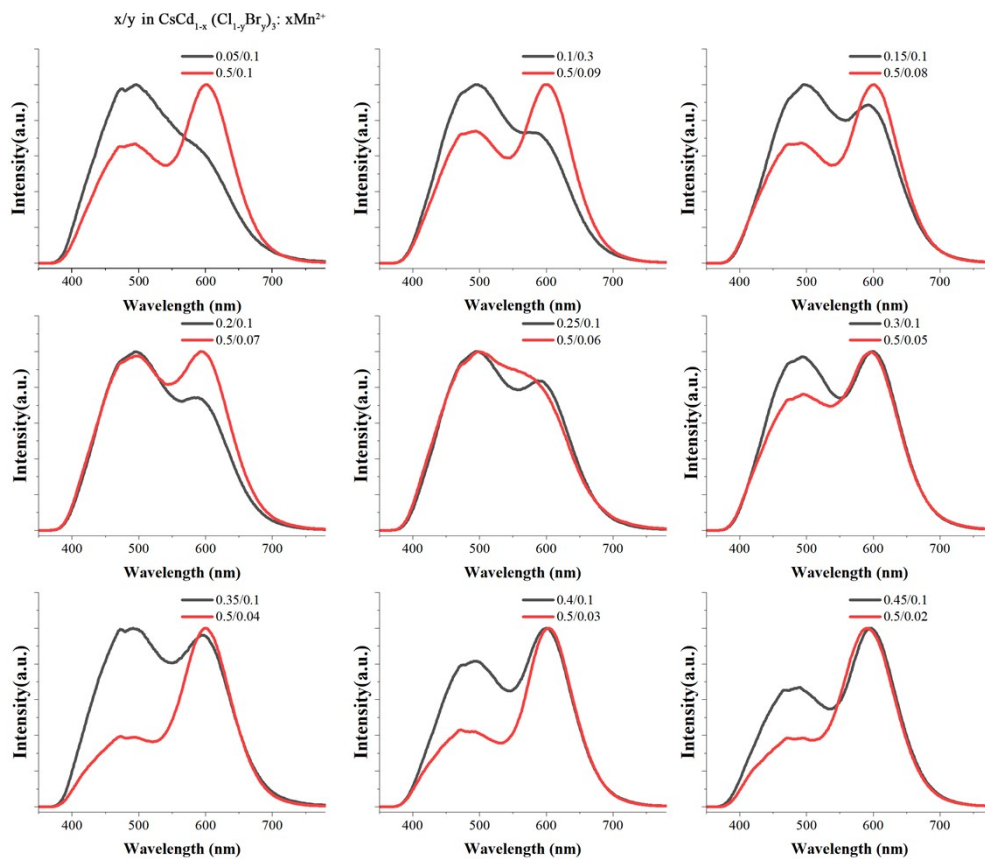

Fig S2 Normalized PL spectrum of CsCd (Cl<sub>1-y</sub>Br<sub>y</sub>)<sub>3</sub>:xMn<sup>2+</sup> (excited at 254 nm) with different x/y ratios

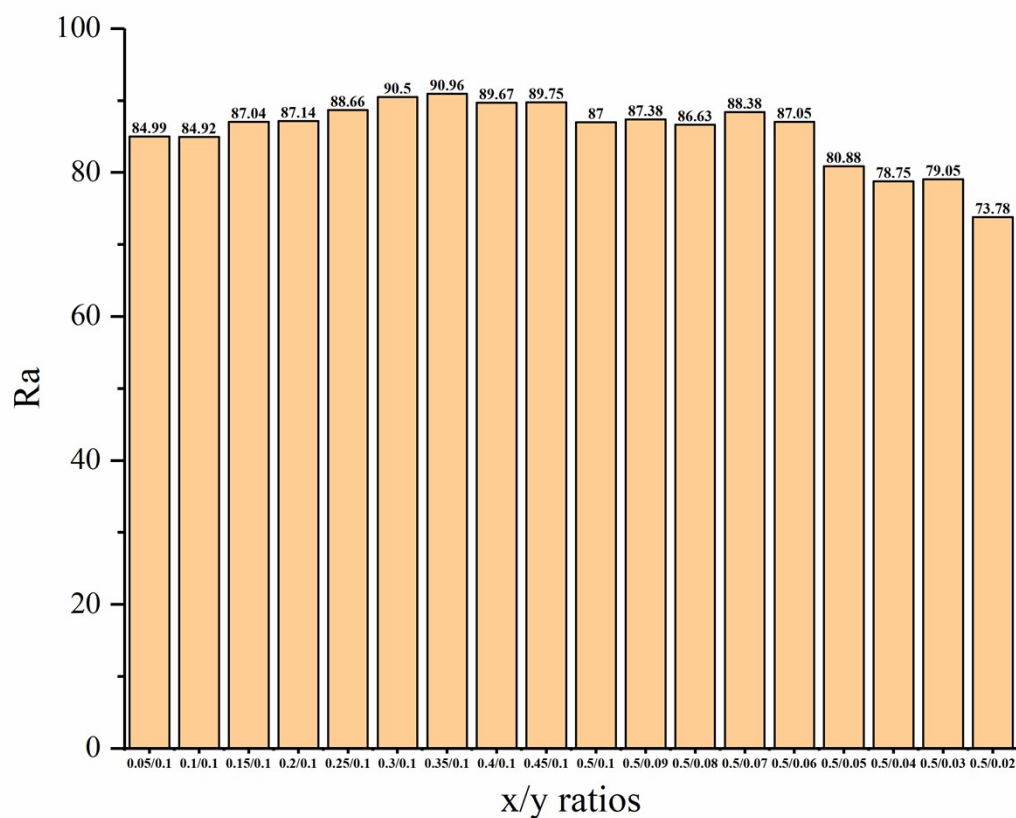

Fig S3 Colour rendering index (Ra) of CsCd (Cl<sub>1-y</sub>Br<sub>y</sub>)<sub>3</sub>: xMn<sup>2+</sup> with different x/y ratios

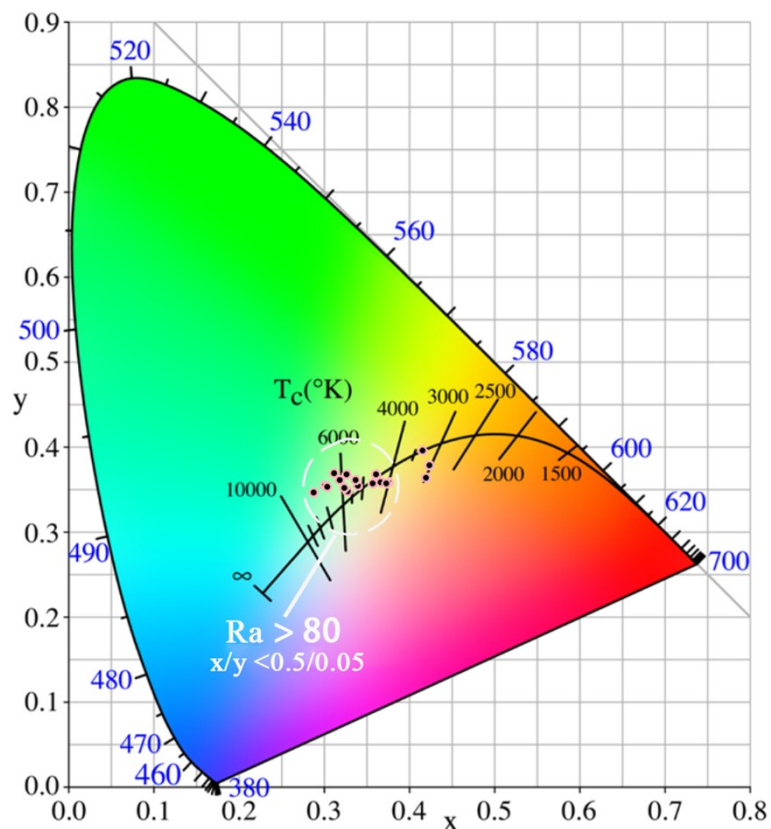

Fig S4 CIE 1931 diagram of CsCd (Cl<sub>1-y</sub>Br<sub>y</sub>)<sub>3</sub>: xMn<sup>2+</sup> with different x/y ratios

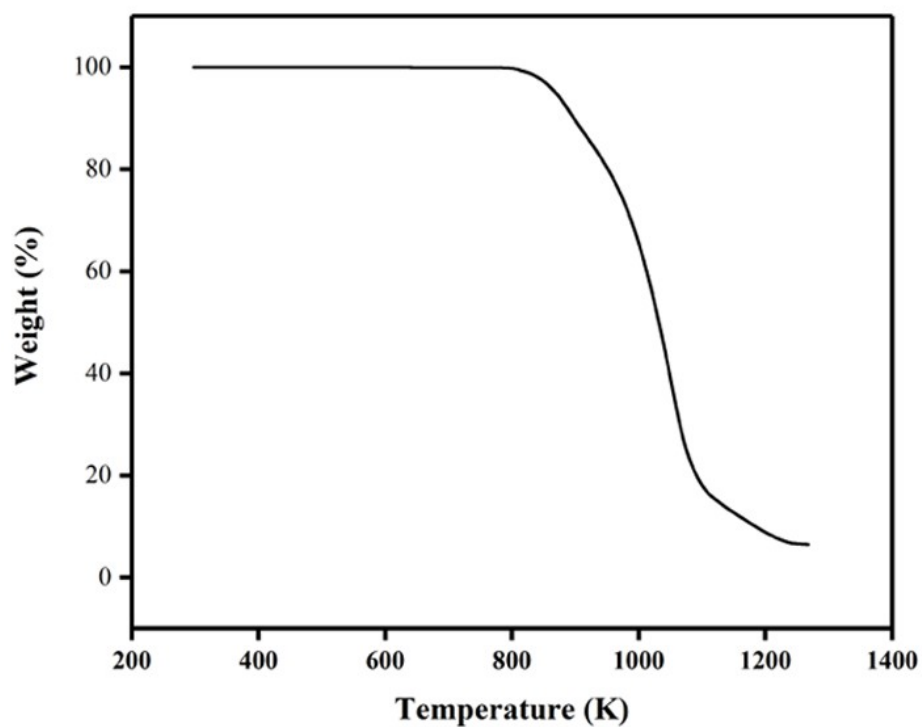

Fig S5 The thermogravimetric analysis of  $\text{CsCd}_{0.6}(\text{Cl}_{0.9}\text{Br}_{0.1})_3: 0.4\text{Mn}^{2+}$

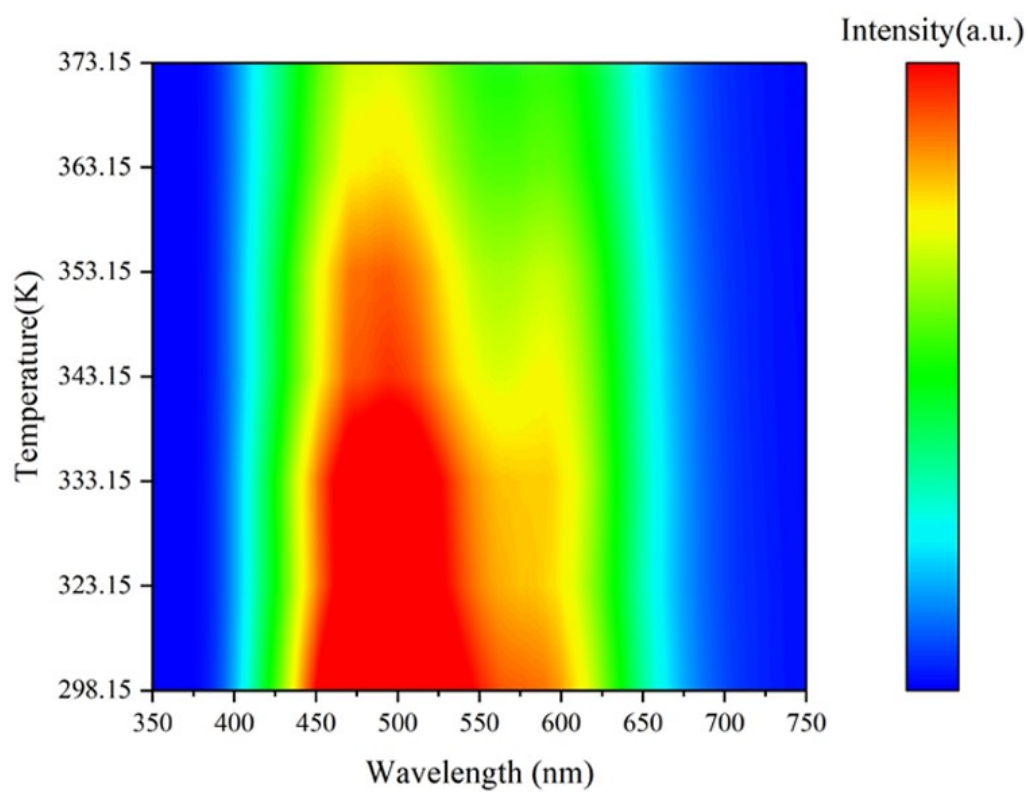

Fig S6 The temperature corresponding PL intensity spectrum of  $\text{CsCd}_{0.6}(\text{Cl}_{0.9}\text{Br}_{0.1})_3: 0.4\text{Mn}^{2+}$

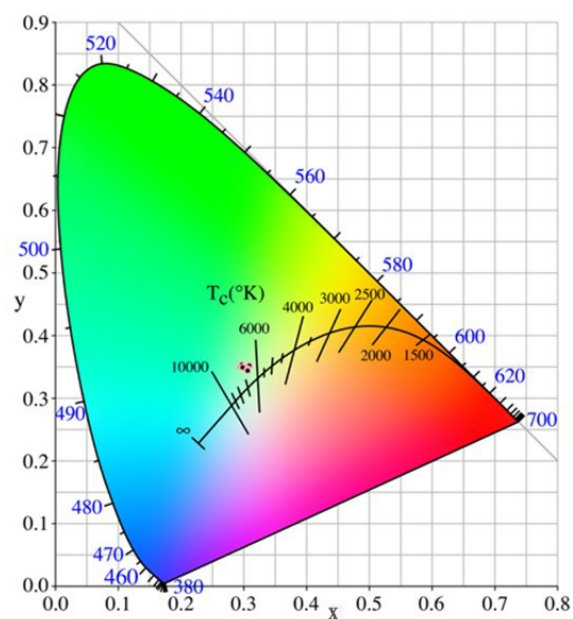

Fig S7 The temperature corresponding CIE 1931 scheme of  $\text{CsCd}_{0.6}(\text{Cl}_{0.9}\text{Br}_{0.1})_3:0.4\text{Mn}^{2+}$

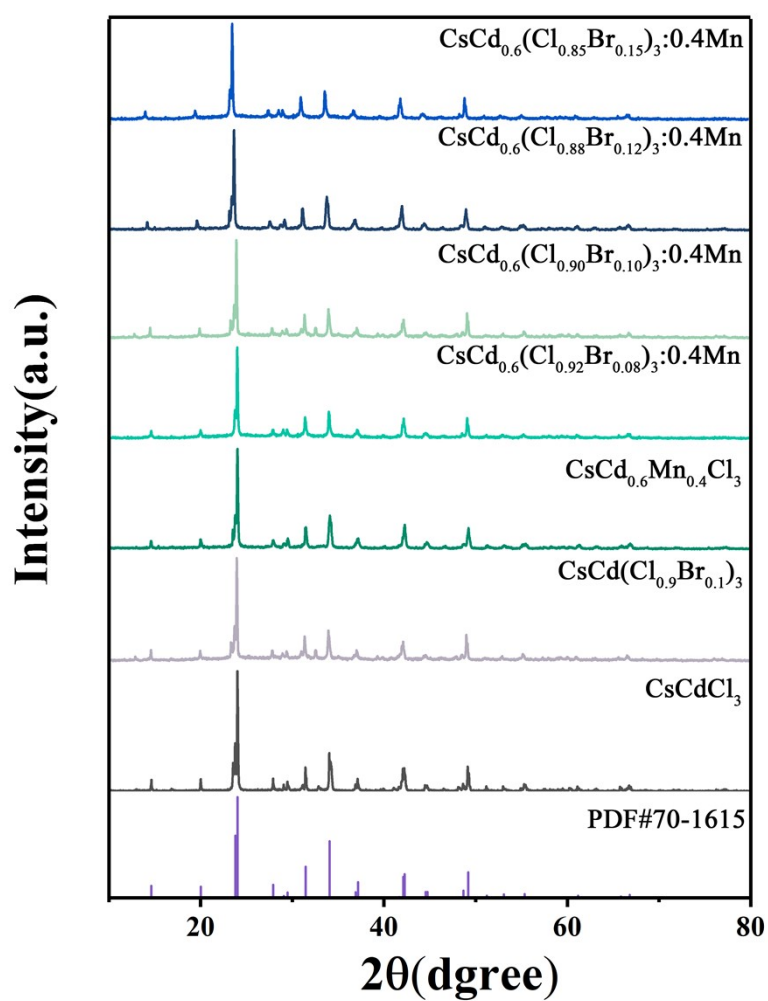

Fig S8 The XRD spectrum of  $\text{CsCd}_{1-x}(\text{Cl}_{1-y}\text{Br}_y)_3:x\text{Mn}^{2+}$

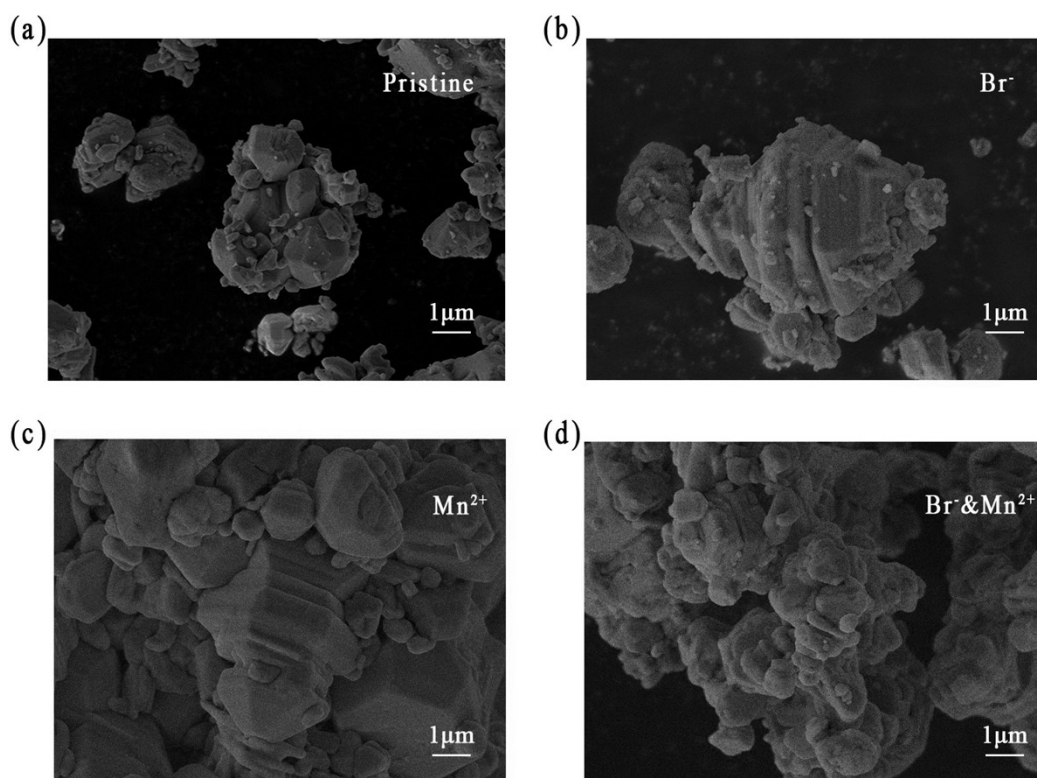

Fig S9(a-d) The Scanning electron microscopy of  $\text{CsCdCl}_3$ ,  $\text{CsCd}(\text{Cl}_{0.9}\text{Br}_{0.1})_3$ ,  $\text{CsCd}_{0.6}\text{Mn}_{0.4}\text{Cl}_3$ , and  $\text{CsCd}_{0.6}(\text{Cl}_{0.9}\text{Br}_{0.1})_3:0.4\text{Mn}^{2+}$

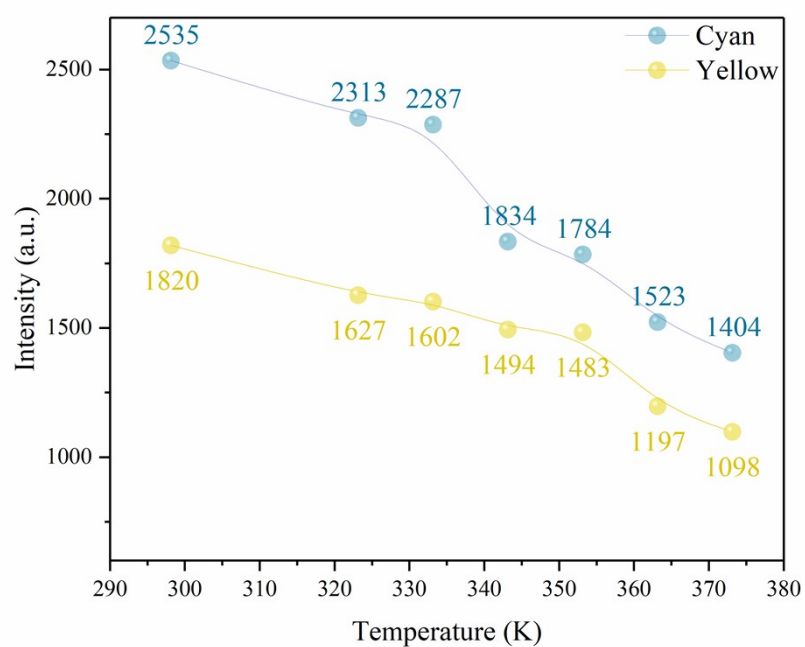

Fig S10 Temperature-dependent PL intensities of  $\text{CsCd}_{0.6}(\text{Cl}_{0.9}\text{Br}_{0.1})_3:0.4\text{Mn}^{2+}$

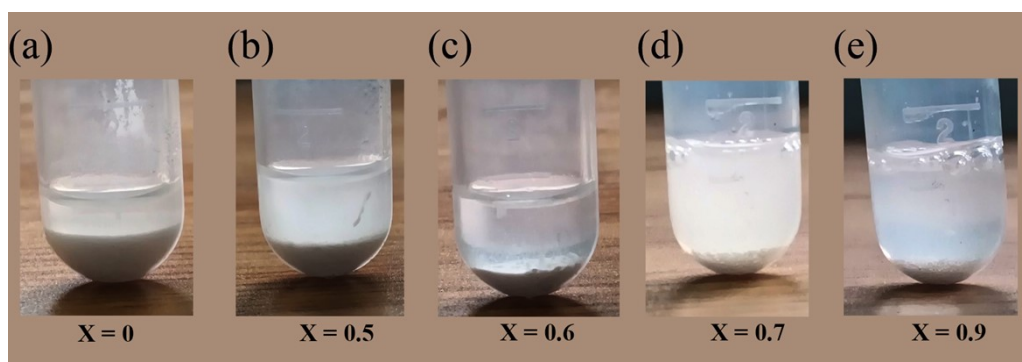

Fig S11 The solubility of  $\text{CsCd}_{1-x}\text{Mn}_x\text{Cl}_3$  in water increases with increasing  $x$  value

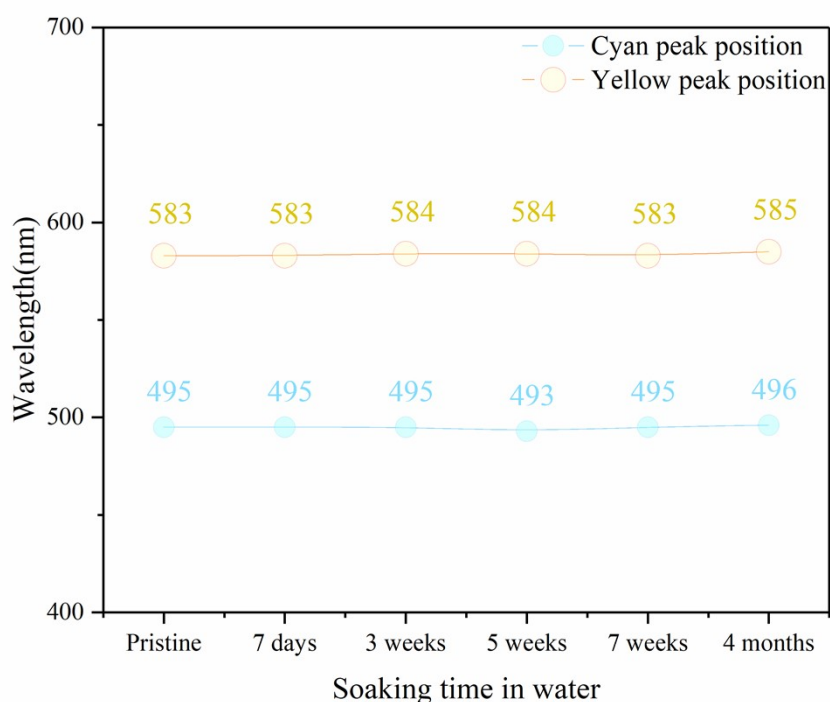

Fig S12 Variation of peak position of  $\text{CsCd}(\text{Cl}_{1-y}\text{Br}_y)_3: x\text{Mn}^{2+}$  at different soaking time in the water.

Table S1 give the lattice parameters of each sample (Calculated by Jade6.5), the three groups of edge lengths of the crystal cell are  $a$ ,  $b$ ,  $c$ , and the included angle between the three groups of edges are  $\alpha$ ,  $\beta$ ,  $\gamma$ .

Table S1 The lattice parameters of each sample

| Samples                                                                 | a       | b       | c        | $\alpha$ | $\beta$ | $\gamma$ |
|-------------------------------------------------------------------------|---------|---------|----------|----------|---------|----------|
| $\text{CsCdCl}_3$                                                       | 7.41114 | 7.41114 | 18.42848 | 90       | 90      | 120      |
| $\text{CsCd}(\text{Cl}_{0.9}\text{Br}_{0.1})_3$                         | 7.41971 | 7.41971 | 18.44307 | 90       | 90      | 120      |
| $\text{CsCd}_{0.6}\text{Mn}_{0.4}\text{Cl}_3$                           | 7.41036 | 7.41036 | 18.43312 | 90       | 90      | 120      |
| $\text{CsCd}(\text{Cl}_{0.98}\text{Br}_{0.08})_3:0.4\text{Mn}^{2+}$     | 7.41153 | 7.41153 | 18.43375 | 90       | 90      | 120      |
| $\text{CsCd}_{0.6}(\text{Cl}_{0.9}\text{Br}_{0.1})_3:0.4\text{Mn}^{2+}$ | 7.41168 | 7.41168 | 18.432   | 90       | 90      | 120      |
| $\text{CsCd}(\text{Cl}_{0.88}\text{Br}_{0.12})_3:0.4\text{Mn}^{2+}$     | 7.42278 | 7.42278 | 18.45203 | 90       | 90      | 120      |
| $\text{CsCd}(\text{Cl}_{0.85}\text{Br}_{0.15})_3:0.4\text{Mn}^{2+}$     | 7.42658 | 7.42658 | 18.4578  | 90       | 90      | 120      |



Table S2 UV-pumped WLED parameters with different x/y of CsCd<sub>1-x</sub>(Cl<sub>1-y</sub>Br<sub>y</sub>)<sub>3</sub>:xMn<sup>2+</sup>

| x/y      | CCT(K) | Ra   | Luminous flux(lm) | luminous efficiencies (lm W <sup>-1</sup> ) |
|----------|--------|------|-------------------|---------------------------------------------|
| 0.1/0.1  | 8042   | 83   | 16.945            | 33.89                                       |
| 0.3/0.1  | 5198   | 90.5 | 19.68             | 39.36                                       |
| 0.3/0.02 | 3039   | 73.2 | 11.77             | 23.84                                       |

## Reference

1. J. Luo, X. Wang, S. Li, J. Liu, Y. Guo, G. Niu, L. Yao, Y. Fu, L. Gao, Q. Dong, C. Zhao, M. Leng, F. Ma, W. Liang, L. Wang, S. Jin, J. Han, L. Zhang, J. Etheridge, J. Wang, Y. Yan, E. H. Sargent and J. Tang, *Nature*, 2018, **563**, 541-545.
2. B. Zhou, Z. Liu, S. Fang, H. Zhong, B. Tian, Y. Wang, H. Li, H. Hu and Y. Shi, *ACS Energy Letters*, 2021, **6**, 3343-3351.
3. F. Li, Z. Xia, C. Pan, Y. Gong, L. Gu, Q. Liu and J. Z. Zhang, *ACS Appl Mater Interfaces*, 2018, **10**, 11739-11746.
4. P.-P. Dai, C. Li, X.-T. Zhang, J. Xu, X. Chen, X.-L. Wang, Y. Jia, X. Wang and Y.-C. Liu, *Light: Science & Applications*, 2016, **5**, e16024-e16024.
